# Supplementary material for: Machine learning derived ECG risk score improves cardiovascular risk assessment in conjunction with coronary artery calcium scoring
Source: PubMed Central journal article supplement (PMC9580025; doi:10.3389/fcvm.2022.976769), 2022-10-05
Supplement: Table_1.pdf [file Table_1.pdf]

## Supplementary

**Table 1: ECG Feature Extraction:**

For each 12-lead ECG test, a total of 649 ECG features (53 per lead and 13 overall) were automatically extracted using commercially available software (GE Muse™ Cardiology Information System, GE Healthcare). The features consisted of measurements such as duration, amplitude, and signal intensity, characterizing signal output from each of the 12-leads.

| <b>ECG Feature Parameters</b>                                                            |                                                                                                                                                                                                                                                                                                                                                                                                                                                                                                                                                                                                |
|------------------------------------------------------------------------------------------|------------------------------------------------------------------------------------------------------------------------------------------------------------------------------------------------------------------------------------------------------------------------------------------------------------------------------------------------------------------------------------------------------------------------------------------------------------------------------------------------------------------------------------------------------------------------------------------------|
| <b>Overall Features</b>                                                                  | P_Onset, P_Offset, QRS_Onset, QRS_Offset, T_Onset, T_Offset, NumQRSComplexes, QRS_Duration, QT_Interval, QTc_Bazett, PR_Interval, VentRate, AvgRRInterval                                                                                                                                                                                                                                                                                                                                                                                                                                      |
| <b>Features per 12-lead</b><br>(I, II, III,<br>aVL, aVF, aVR,<br>V1, V2, V3, V4, V5, V6) | P_OnsetAmpl, P_PeakAmpl, P_Duration, P_Area, P_PeakTime, PP_PeakAmpl, PP_Duration, PP_Area, PP_PeakTime, Q_PeakAmpl, Q_Duration, Q_Area, Q_PeakTime, R_PeakAmpl, R_Duration, R_Area, R_PeakTime, S_PeakAmpl, S_Duration, S_Area, S_PeakTime, RP_PeakAmpl, RP_Duration, RP_Area, RP_PeakTime, SP_PeakAmpl, SP_Duration, SP_Area, SP_PeakTime, STJ, STM, STE, MaxST, MinST, T_Special, QRS_Balance, QRS_Deflection, Max_R_Ampl, Max_S_Ampl, T_PeakAmpl, T_Duration, T_Area, T_PeakTime, TP_PeakAmpl, TP_Duration, TP_Area, TP_PeakTime, T_End, PFull_Area, QRS_Area, TFull_Area, QRSint, BitFlag |
