# Supplementary material for: Machine learning derived ECG risk score improves cardiovascular risk assessment in conjunction with coronary artery calcium scoring
Source: PubMed Central journal article supplement (PMC9580025; doi:10.3389/fcvm.2022.976769), 2022-10-05
Supplement: Table_2.pdf [file Table_2.pdf]

## Supplementary

**Table 2: ECG Feature Selection:**

Using LASSO-Cox analysis, top features were selected and used to construct an ECG Risk Score (eRis). This was done across the different training-validation splits. 28 features were consistently picked by the 4 split sizes. The consensus of features across the splits is listed in this table

| <b>ECG Feature Parameters: Consensus</b> |                                                                       |                                                   |
|------------------------------------------|-----------------------------------------------------------------------|---------------------------------------------------|
| <b>Overall</b>                           | NumQRSComplexes, PR_Interval, P_Offset, P_Onset, QTc_Bazett, VentRate |                                                   |
| <b>Leads</b>                             | <b>I</b>                                                              | QRSint, RP_Area                                   |
|                                          | <b>II</b>                                                             | TFull_Area, TP_PeakAmpl                           |
|                                          | <b>III</b>                                                            | T_Duration                                        |
|                                          | <b>aVL</b>                                                            | -                                                 |
|                                          | <b>aVF</b>                                                            | -                                                 |
|                                          | <b>aVR</b>                                                            | P_PeakAmpl, QRS_Deflection, TFull_Area, T_Special |
|                                          | <b>V1</b>                                                             | PP_Area, T_PeakAmpl, T_Special                    |
|                                          | <b>V2</b>                                                             | T_PeakTime                                        |
|                                          | <b>V3</b>                                                             | Max_S_Ampl, PP_Duration, QRS_Deflection, T_End    |
|                                          | <b>V4</b>                                                             | -                                                 |
|                                          | <b>V5</b>                                                             | MaxST,                                            |
|                                          | <b>V6</b>                                                             | RP_PeakTime, TFull_Area, TP_PeakTime, T_Area      |
